# Supplementary material for: The Use of an Edible Mushroom-Derived Renewable Carbon Material as a Highly Stable Electrocatalyst towards Four-Electron Oxygen Reduction
Source: MDPI journal article supplement (doi:10.3390/ma9010001), 2015-12-23
Supplement: s1 [file s1]

# Supplementary Materials: The Use of an Edible Mushroom-Derived Renewable Carbon Material as a Highly Stable Electrocatalyst towards Four-Electron Oxygen Reduction

Chaozhong Guo, Lingtao Sun, Wenli Liao and Zhongbin Li

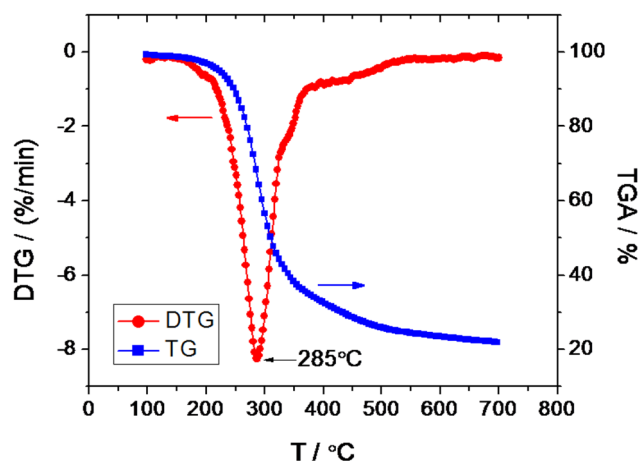

**Figure S1.** The Thermogravimetric and differential thermogravimetric (TG-DTG) analysis of enoki mushroom (EM) dried powder; TG measurements were recorded from 100 to 700 °C with a ramp rate of 10 °C·min<sup>-1</sup>. It is found that the decomposition of biological protein inside EM occurred at about 300 °C.

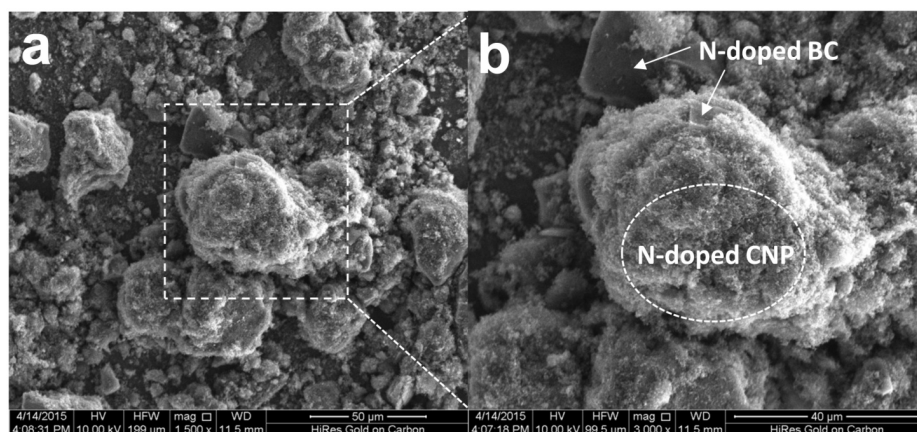

**Figure S2.** The scanning electron microscopy (SEM) image (a,b) of the nitrogen-doped biocarbon composite material (N-BC@CNP-900) catalyst.
